# Supplementary material
Source: Royal Society of Chemistry journal article supplement (doi:10.1039/d6ta00928j)
Supplement: d6ta00928j1.pdf [file d6ta00928j1.pdf]

## Electronic supplementary information

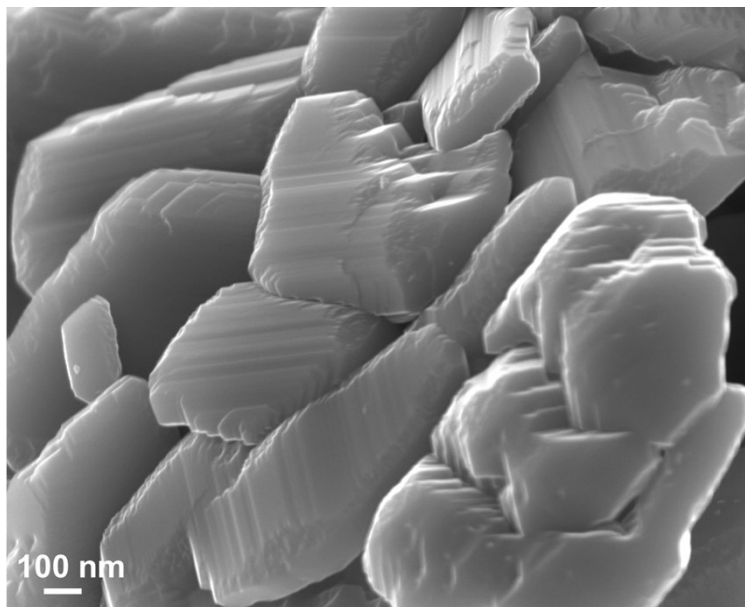

**Fig. S1.** SEM image of V<sub>2</sub>O<sub>5</sub> nanoparticle.

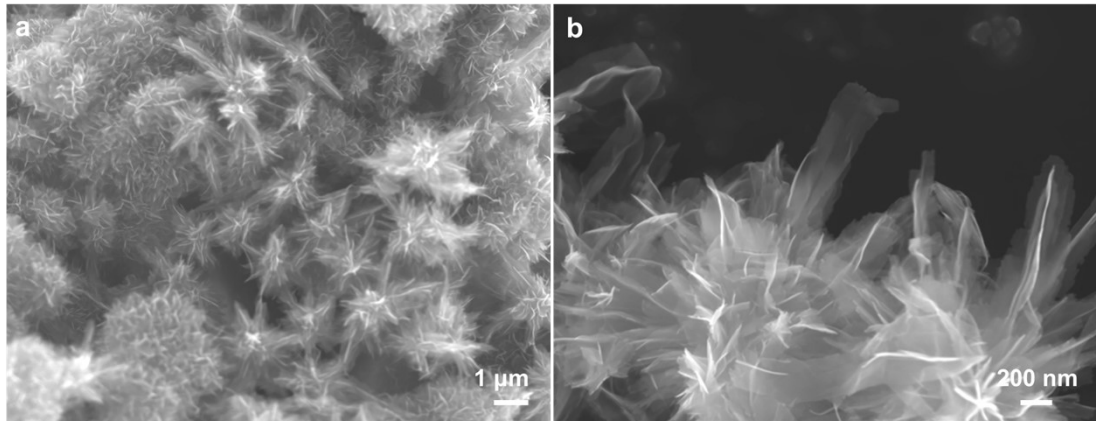

**Fig. S2.** SEM images of P-VO<sub>x</sub> hybrid.

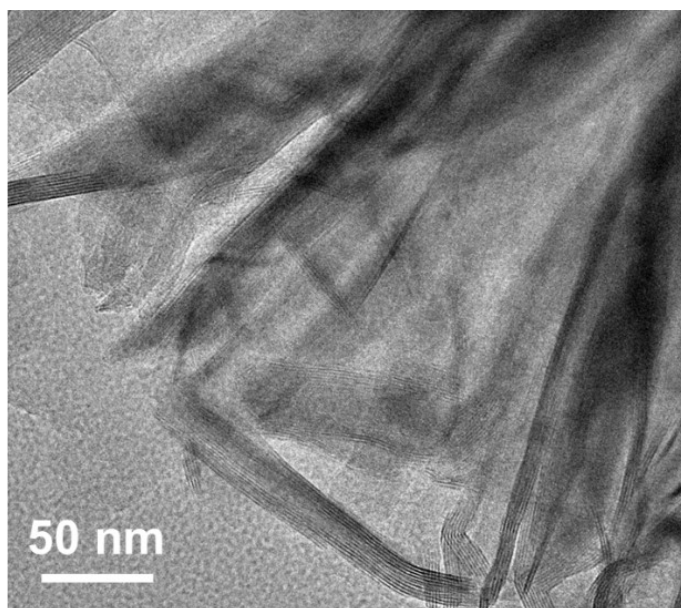

**Fig. S3.** TEM image of P-VO<sub>x</sub> hybrid.

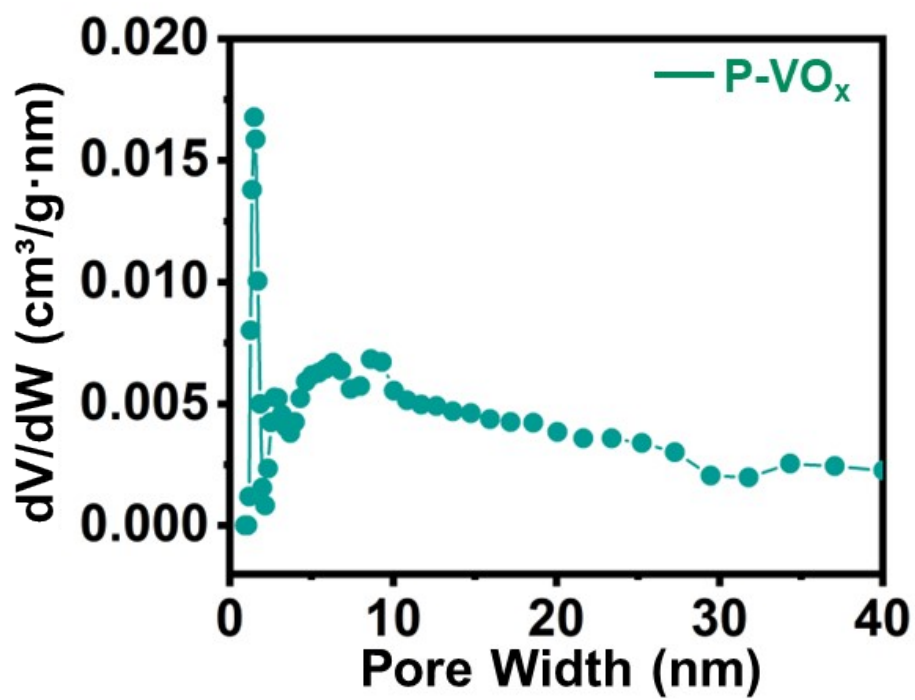

Fig. S4. Pore volume distribution of P-VO<sub>x</sub>.

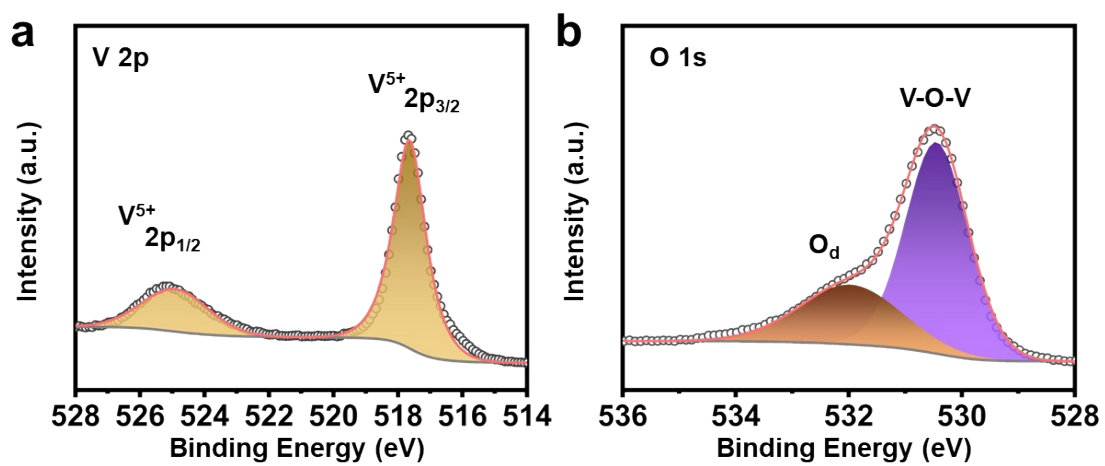

Fig. S5. (a) V 2p and (b) O 1s XPS spectra of  $V_2O_5$  nanoparticle.

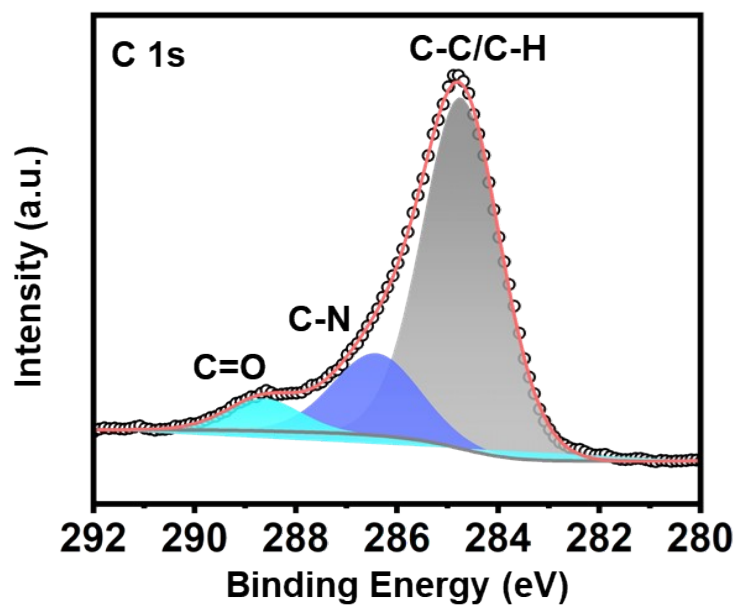

**Fig. S6.** C 1s XPS spectra of P-VO<sub>x</sub> hybrid.

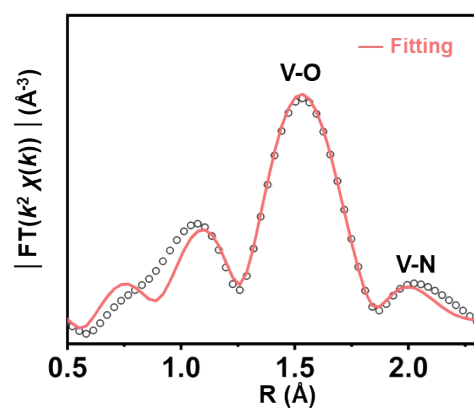

**Fig. S7.** Quantitative fitting of the V K-edge EXAFS for the P-VO<sub>x</sub> sample.

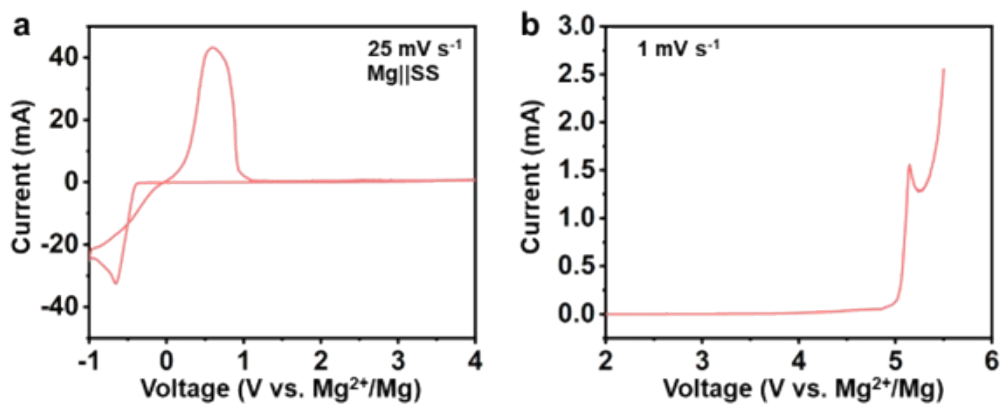

**Fig. S8.** (a) CV curves of Mg||SS cells at  $25 \text{ mV s}^{-1}$  with the  $\text{Mg}[\text{B}(\text{HFIP})_4]_2/\text{DME}$  electrolytes. (b) LSV curves of Mg||GC cells at  $1 \text{ mV s}^{-1}$  with carbon paper current collector as the working electrode substrate.

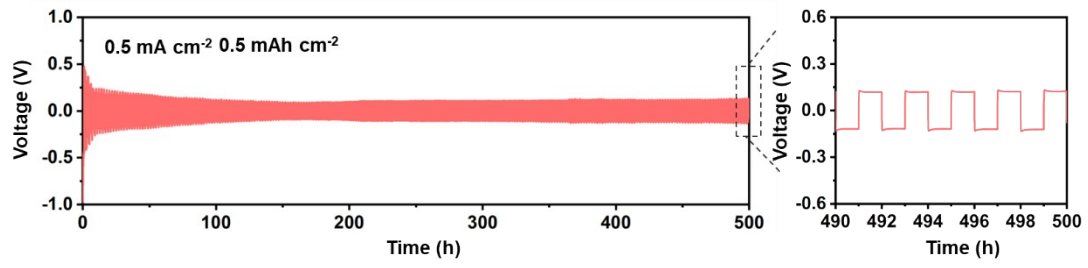

**Fig. S9.** Cycling performance of Mg||Mg cell at  $0.5 \text{ mA cm}^{-2}$  with  $0.5 \text{ mAh cm}^{-2}$ .

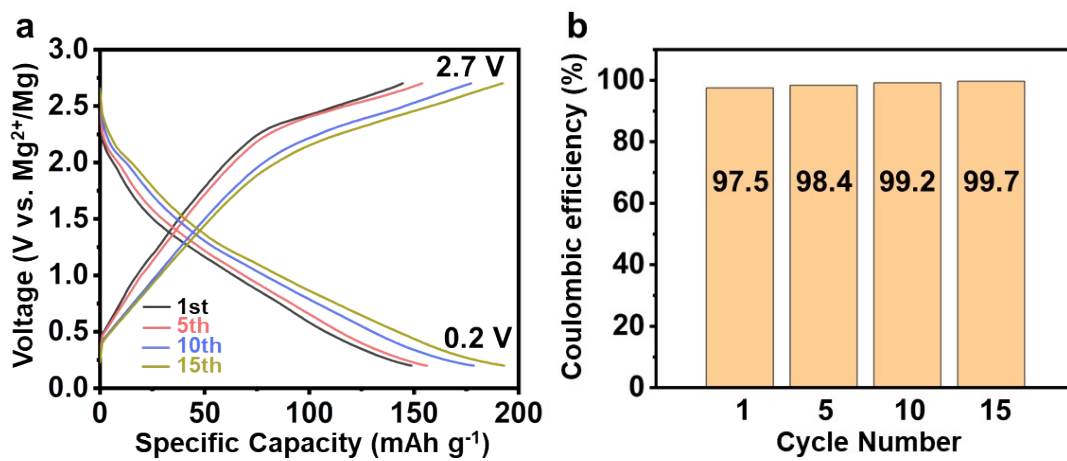

**Fig. S10.** (a) Charge-discharge curves under different cycles of P-VO<sub>x</sub> cathode in RMBs at a current density of 0.1 A g<sup>-1</sup> within a voltage window of 0.2-2.7 V. (b) Coulombic efficiency under different cycles.

**Table S1.** The Mg content determined by ICP-OES for P-VO<sub>x</sub> at different states.

| <b>Samples</b>     | <b>Weight of the electrodes (mg)</b> | <b>Weight of active materials (mg)</b> | <b>Constant volume (L)</b> | <b>Mg mass concentration (mg/L)</b> | <b>Mg content (wt%)</b> |
|--------------------|--------------------------------------|----------------------------------------|----------------------------|-------------------------------------|-------------------------|
| Initial discharge  | 9.2                                  | 6.44                                   | 0.1                        | 5.4538                              | 8.46                    |
| Initial charge     | 7.4                                  | 5.18                                   | 0.1                        | 0.9798                              | 1.88                    |
| The 10th discharge | 12.0                                 | 8.4                                    | 0.1                        | 9.7258                              | 11.57                   |
| The 10th charge    | 8.4                                  | 5.88                                   | 0.1                        | 1.8228                              | 3.1                     |

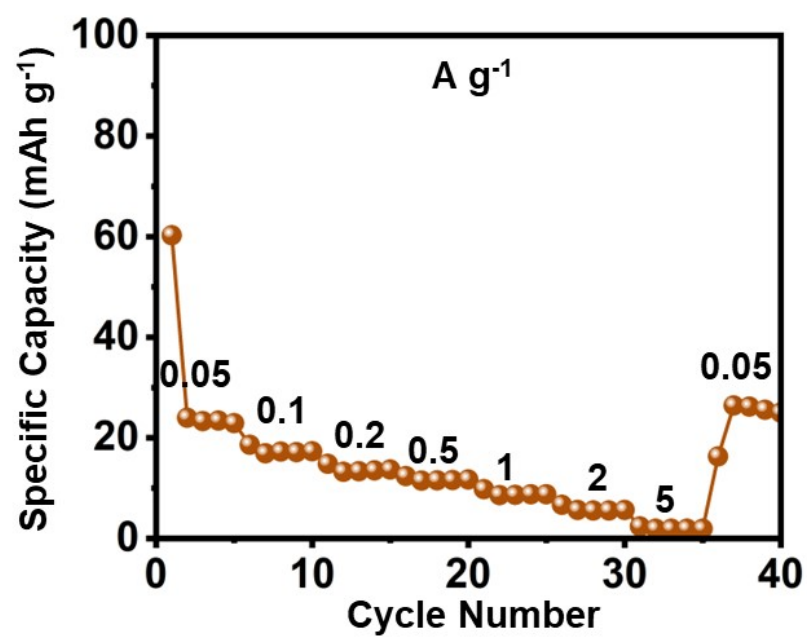

Fig. S11. Rate capability of V<sub>2</sub>O<sub>5</sub> nanoparticle.

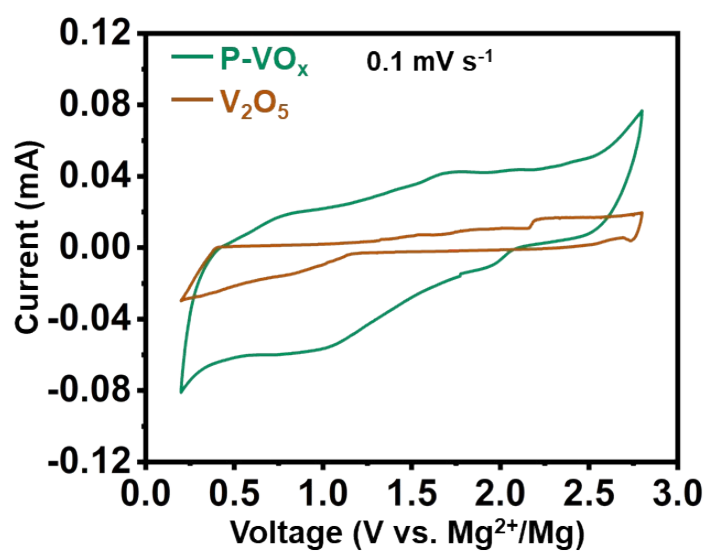

**Fig. S12.** CV curves of V<sub>2</sub>O<sub>5</sub> and P-VO<sub>x</sub> cathodes at scan rates of 0.1 mV s<sup>-1</sup>.

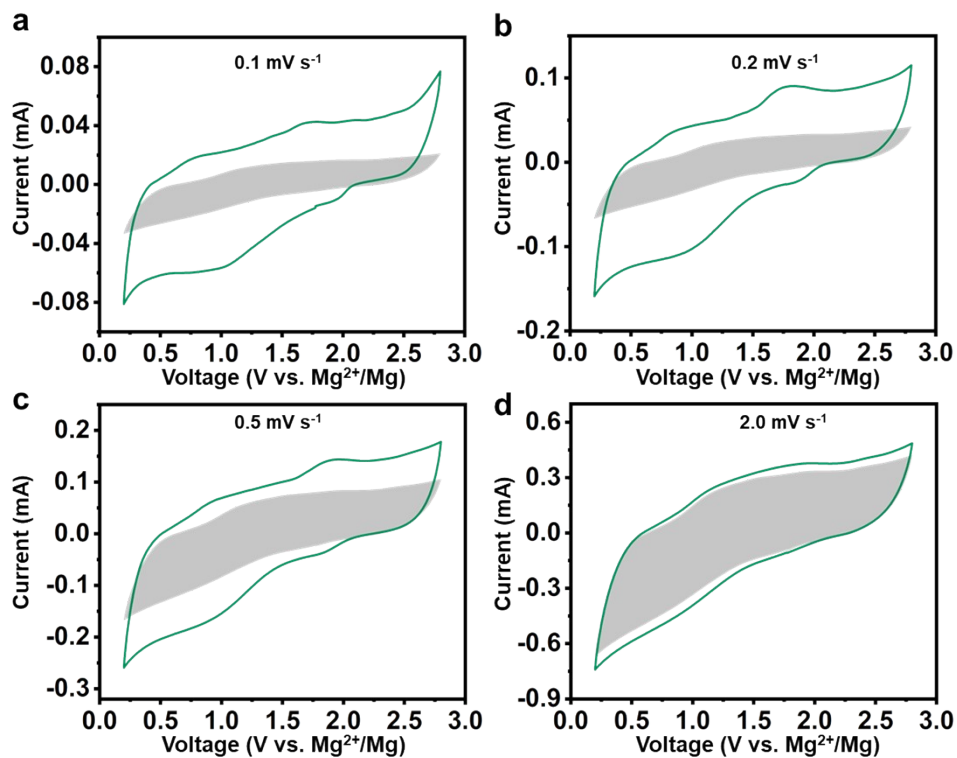

**Fig. S13.** CV curve of P-VO<sub>x</sub> at the scan rate of (a) 0.1 mV s<sup>-1</sup>, (b) 0.2 mV s<sup>-1</sup>, (c) 0.5 mV s<sup>-1</sup> and (d) 2.0 mV s<sup>-1</sup>. The shaded area represents the capacitive current response ascribed from surface/near surface reaction.

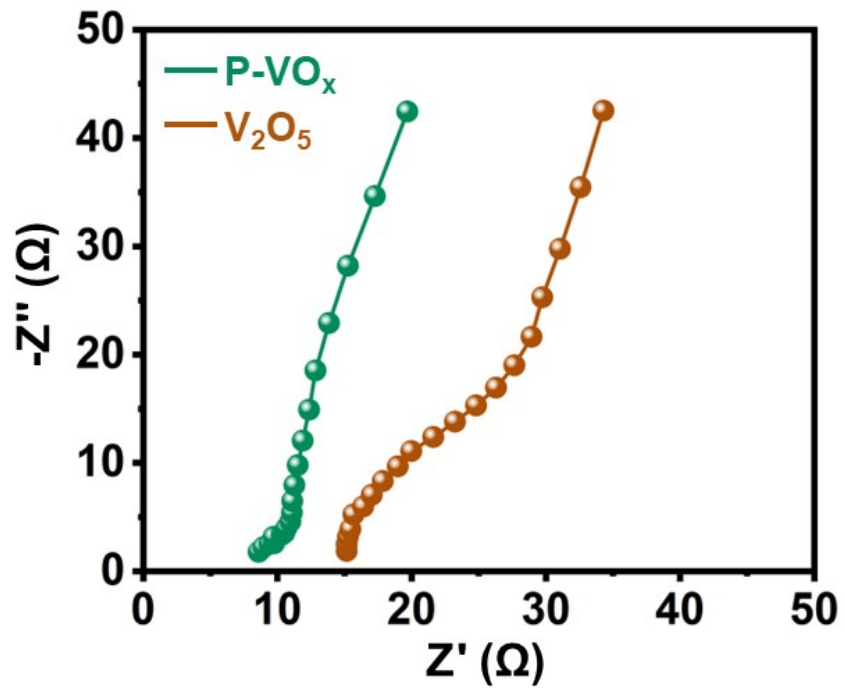

Fig. S14. Nyquist plots of  $V_2O_5$  and  $P-VO_x$  initial electrodes.

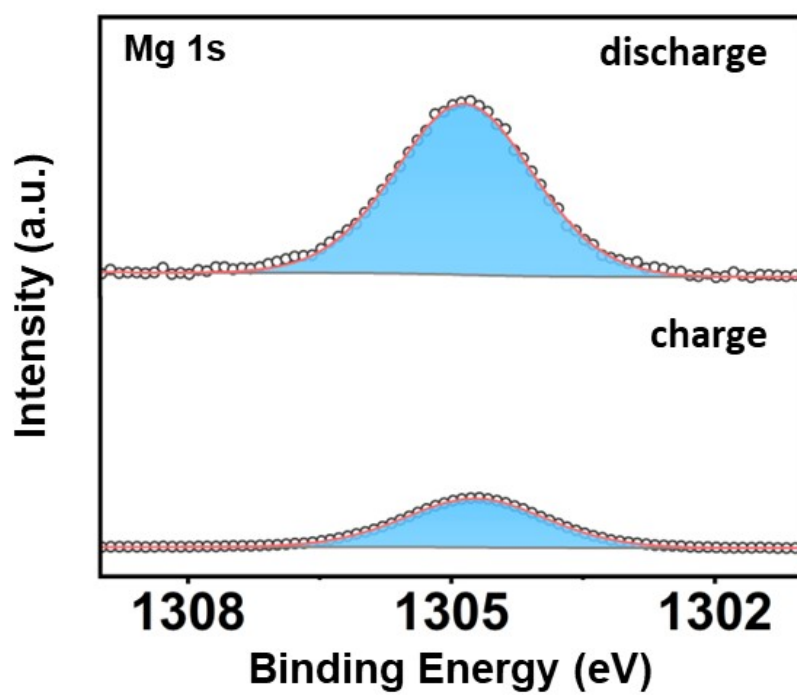

**Fig. S15.** Mg 1s XPS spectra of P-VO<sub>x</sub> electrode in discharged and charged states.

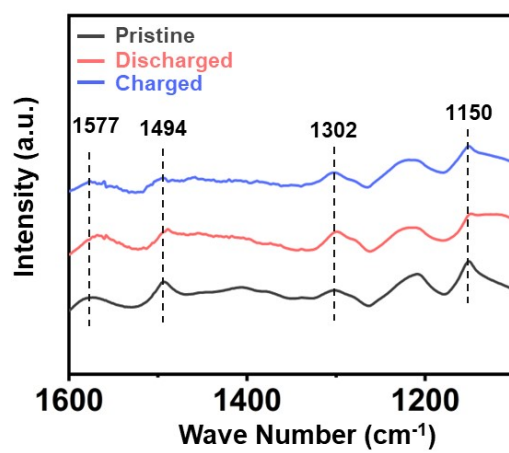

**Fig. S16.** Ex-situ FTIR of the P-VO<sub>x</sub> cathode before and after cycling.

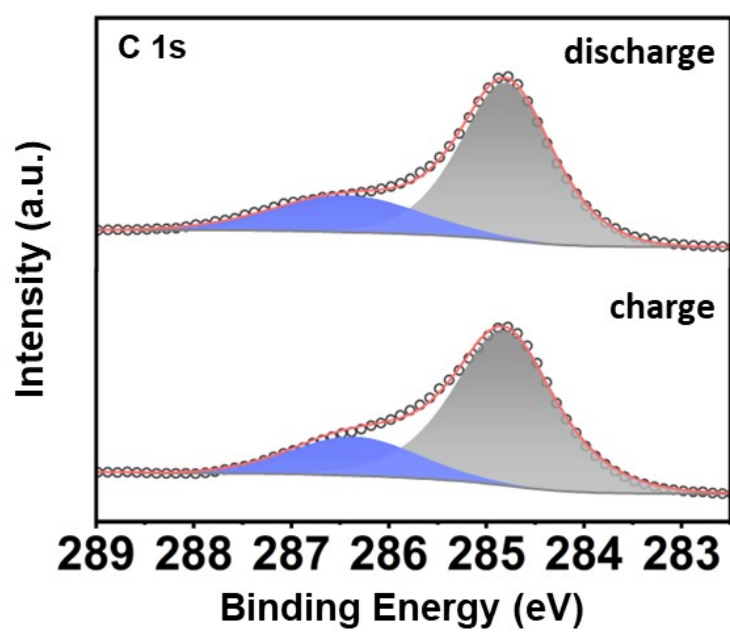

**Fig. S17.** C 1s XPS spectra of P-VO<sub>x</sub> electrode in discharged and charged states.

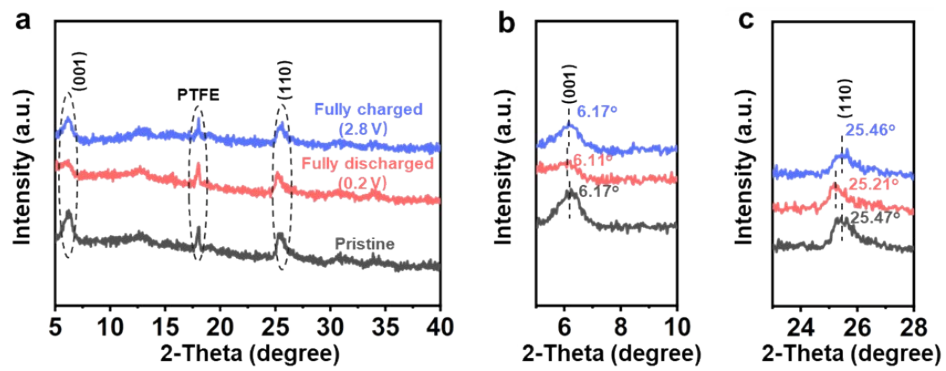

**Fig. S18.** (a) XRD pattern of P-VO<sub>x</sub> electrode under different states. Fine variations of (b) (001) peak and (c) (110) peak.

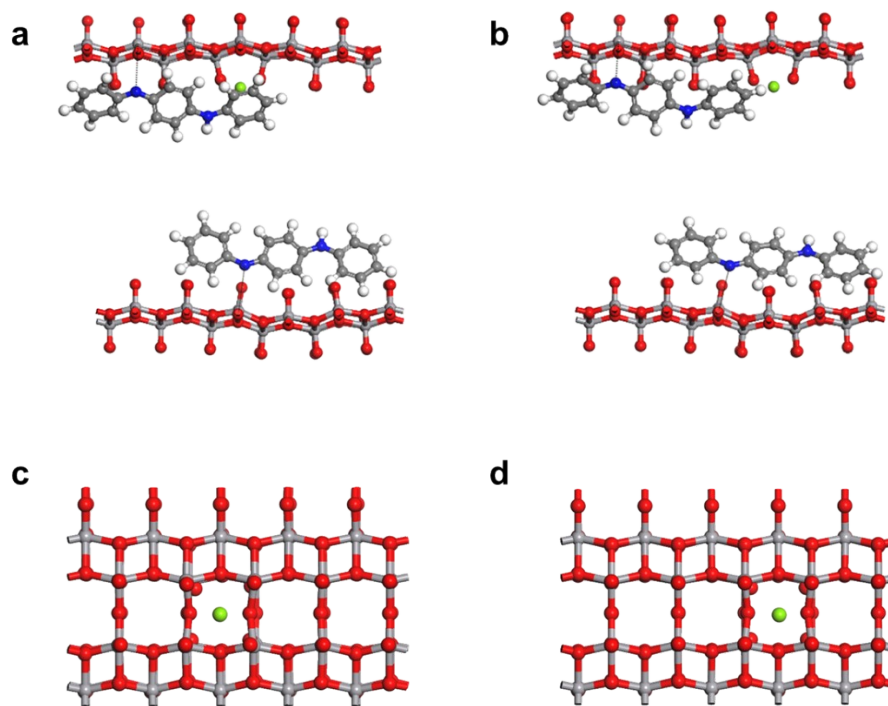

**Fig. S19.** DFT-calculated (a) initial position and (b) final position of Mg<sup>2+</sup> along the migration path over P-VO<sub>x</sub>. DFT-calculated (c) initial position and (d) final position of Mg<sup>2+</sup> along the migration path over V<sub>2</sub>O<sub>5</sub>.
